# Supplementary material
Source: Research Square preprint supplement (doi:10.21203/rs.3.rs-9188042/v1)
Supplement: Supplementary file 1 [file c4cf32d326a743de3164ece1.docx]

**Supplementary Tables**

*Neuropathological copathology burden and cognitive decline in the National Alzheimer's Coordinating Center cohort*

**Supplementary Table S1.** Complete distribution of all 16 observed copathology combinations.

| **Pathology combination** | **N** | **%** |
| --- | --- | --- |
| ADNC alone | 3,366 | 39.2 |
| ADNC + LBD | 2,339 | 27.3 |
| No/minimal pathology | 1,266 | 14.8 |
| LBD alone | 378 | 4.4 |
| FTLD-tau alone | 354 | 4.1 |
| ADNC + FTLD-tau | 280 | 3.3 |
| ADNC + LBD + FTLD-tau | 189 | 2.2 |
| TDP-43 alone | 171 | 2.0 |
| ADNC + TDP-43 | 68 | 0.8 |
| LBD + FTLD-tau | 62 | 0.7 |
| ADNC + TDP-43 + FTLD-tau | 29 | 0.3 |
| TDP-43 + FTLD-tau | 23 | 0.3 |
| LBD + TDP-43 | 19 | 0.2 |
| ADNC + LBD + TDP-43 | 17 | 0.2 |
| ADNC + LBD + TDP-43 + FTLD-tau | 12 | 0.1 |
| LBD + TDP-43 + FTLD-tau | 4 | < 0.1 |

*Abbreviations: ADNC, Alzheimer's disease neuropathologic change; FTLD-tau, frontotemporal lobar degeneration tauopathy; LBD, Lewy body disease; TDP-43, TAR DNA-binding protein 43 proteinopathy. Combinations are listed in descending order of frequency. Total N = 8,577.*

**Supplementary Table S2.** Annual CDR-SB decline rates by copathology burden group.

| **Copathology burden** | **N** | **Mean annual CDR-SB change (SD)** | **Median** |
| --- | --- | --- | --- |
| 0 (no pathology) | 850 | 0.90 (1.79) | 0.08 |
| 1 (single) | 3,211 | 1.47 (1.77) | 1.00 |
| 2 (dual) | 2,153 | 1.71 (1.91) | 1.28 |
| 3 (triple) | 198 | 1.25 (1.54) | 0.88 |
| 4 (quadruple) | 11 | 2.21 (2.20) | 1.22 |

*Abbreviations: CDR-SB, Clinical Dementia Rating Sum of Boxes; SD, standard deviation. Annual decline rate calculated as (last CDR-SB − first CDR-SB) / follow-up duration in years per subject.*

**Supplementary Table S3.** Sensitivity analyses for the dose-response relationship between copathology burden and cognitive decline rate.

| **Analysis** | **N subjects** | **N visits** | **Time × burden β** | **95% CI** | **P** |
| --- | --- | --- | --- | --- | --- |
| Primary (≥ 2 visits) | 6,377 | 30,215 | 0.25 | 0.21, 0.29 | < 0.001 |
| SA1: ≥ 3 visits | 4,895 | 27,251 | 0.23 | 0.19, 0.28 | < 0.001 |
| SA2: ≥ 5 years follow-up | 2,127 | 16,770 | 0.19 | 0.16, 0.23 | < 0.001 |

*Abbreviations: β, regression coefficient; CDR-SB, Clinical Dementia Rating Sum of Boxes; CI, confidence interval; SA, sensitivity analysis. All models adjusted for age, sex, education, and APOE ε4 status using linear mixed-effects models with random intercepts and slopes.*
